# Supplementary material for: Longitudinal whole blood transcriptomic analysis characterizes neutrophil activation and interferon signaling in moderate and severe COVID-19
Source: PubMed Central journal article supplement (PMC10293211; doi:10.1038/s41598-023-37606-y), 2023-06-26
Supplement: 41598_2023_37606_MOESM8_ESM.pdf [file 41598_2023_37606_MOESM8_ESM.pdf]

## Supplementary Figures

**Title: Longitudinal whole blood transcriptomic analysis characterizes neutrophil activation and interferon signaling in moderate and severe COVID-19.**

Authors:

Christian Prebensen (co-first, corresponding)

Yohan Lefol (co-first)

Peder Myhre

Torben Lüders

Christine Jonassen

Anita Blomfeldt

Torbjørn Omland

Hilde Nilsen

Jan-Erik Berdal

## Supplementary Figure 1:

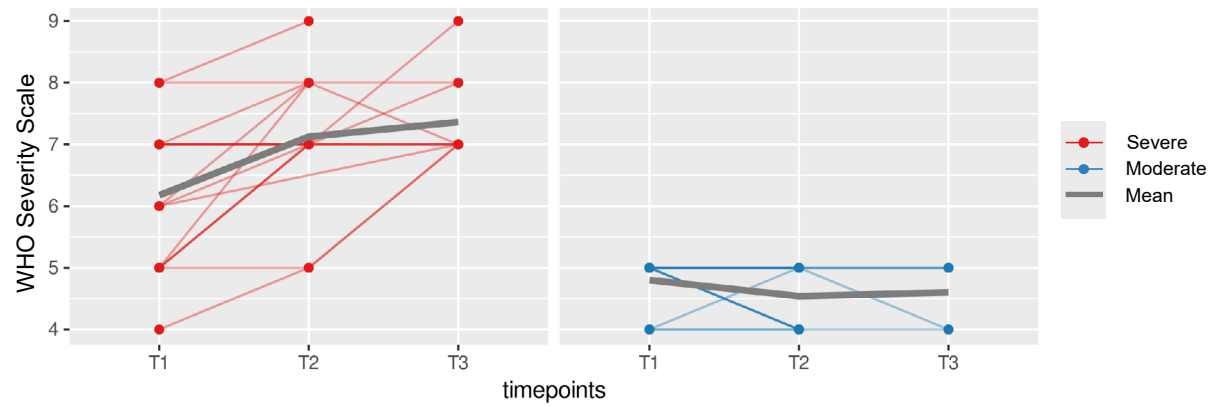

**Clinical trajectories.** WHO severity scale over time in severe (red) and moderate (blue) patients. Mean values in grey.

## Supplementary Figure 2:

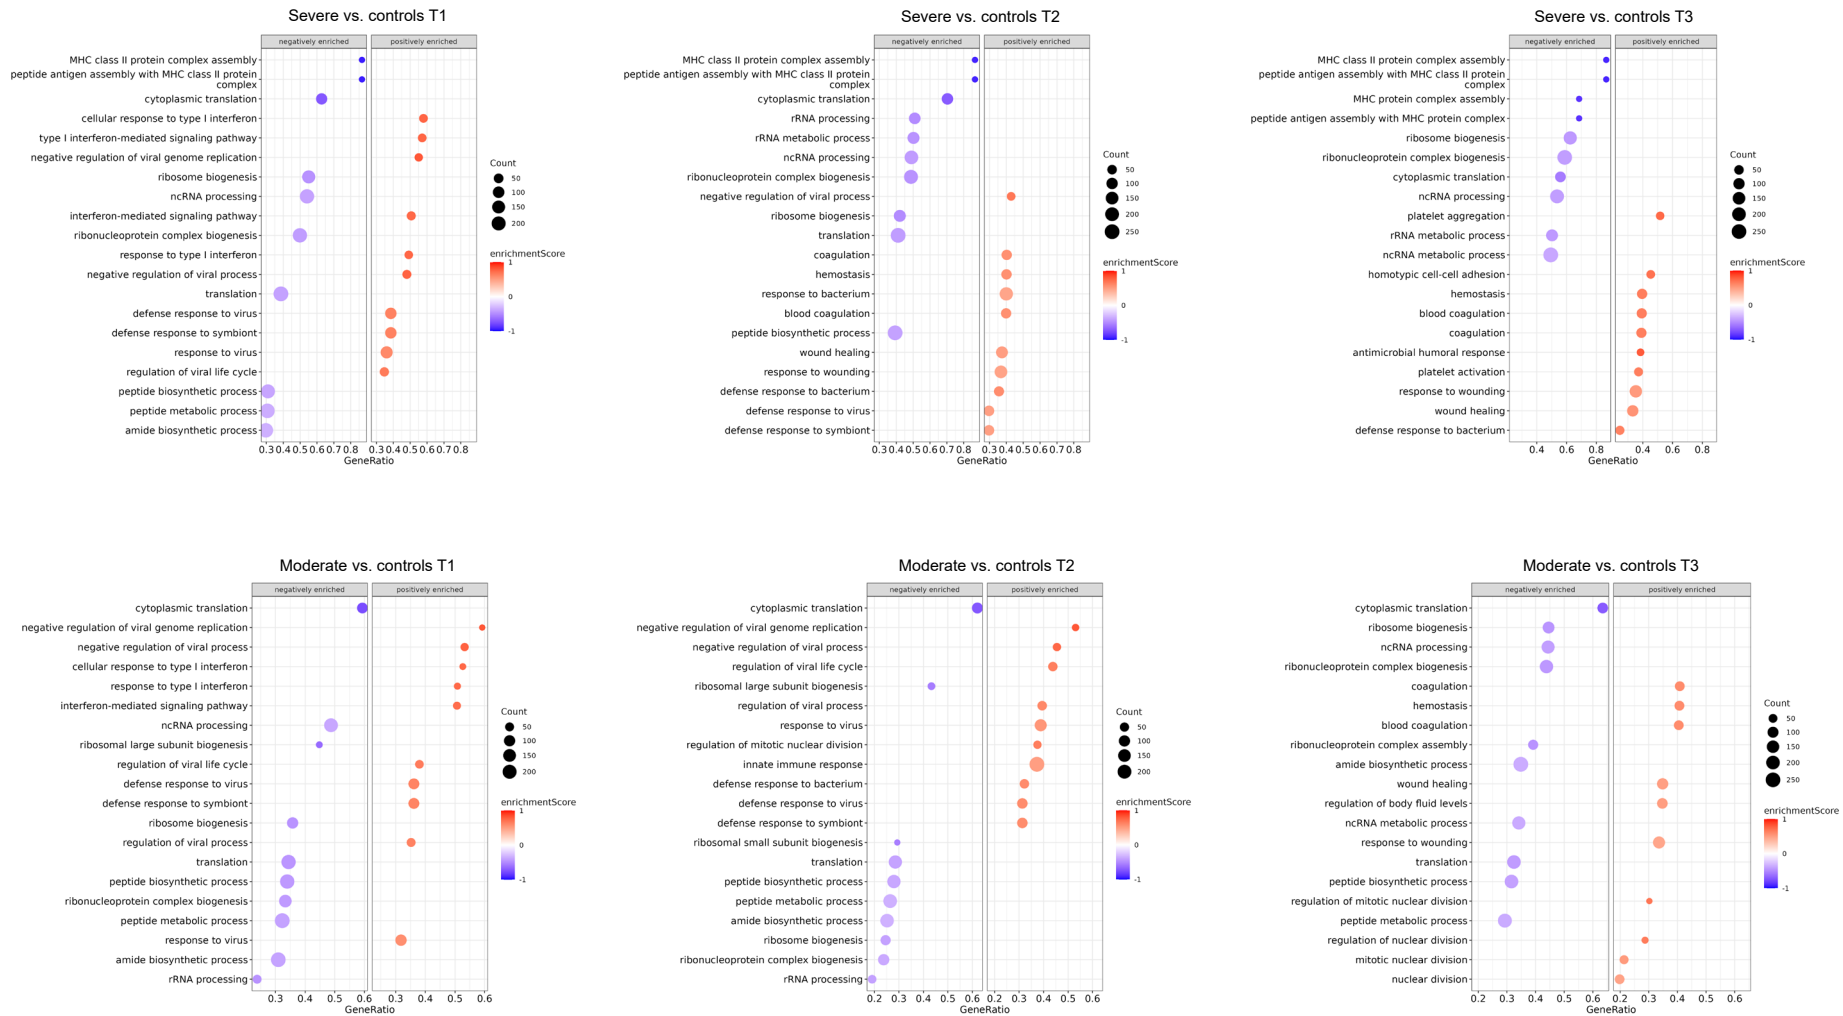

Gene set enrichment analysis (GSEA) in severe and moderate patients vs. healthy controls. Top 20 GO terms for each comparison indicated.

### Supplementary Figure 3:

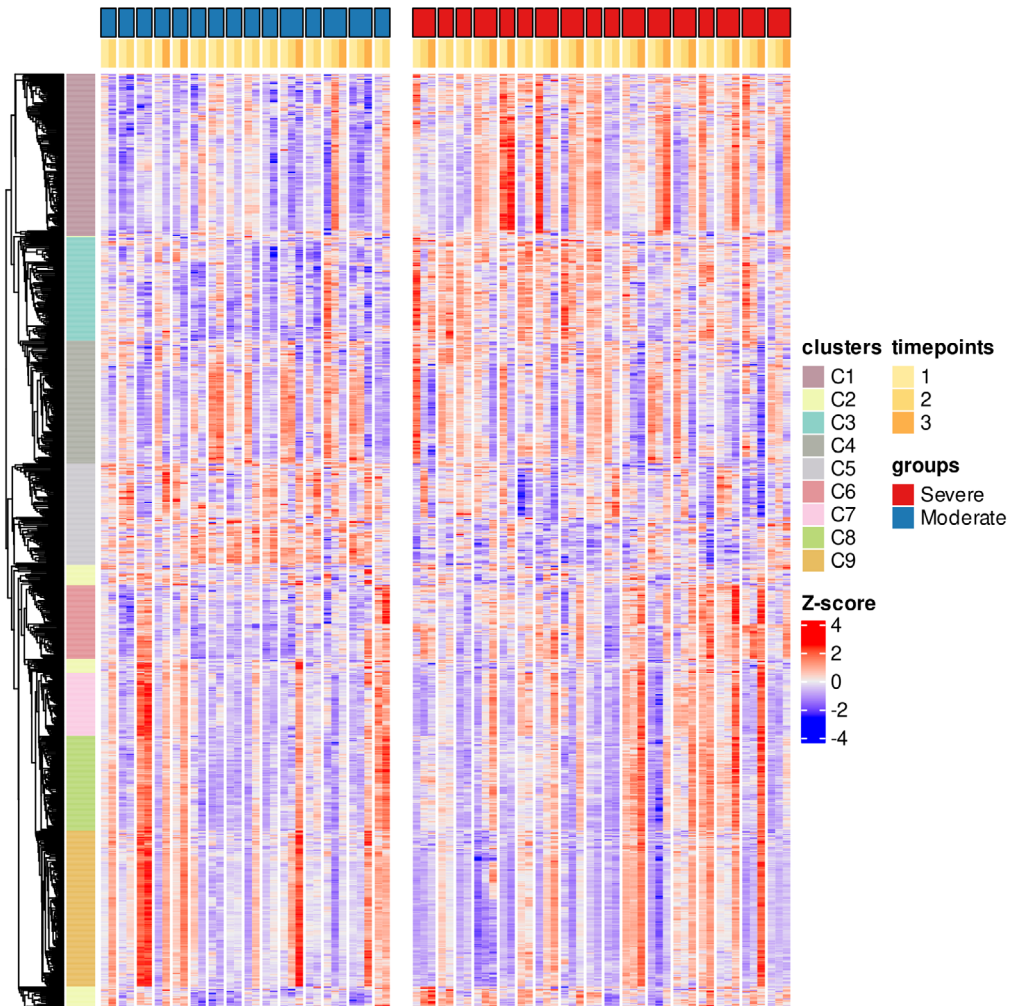

**Time Series heatmap.** Heat map showing the results of PART clustering in the time series analysis.

## Supplementary Figure 4:

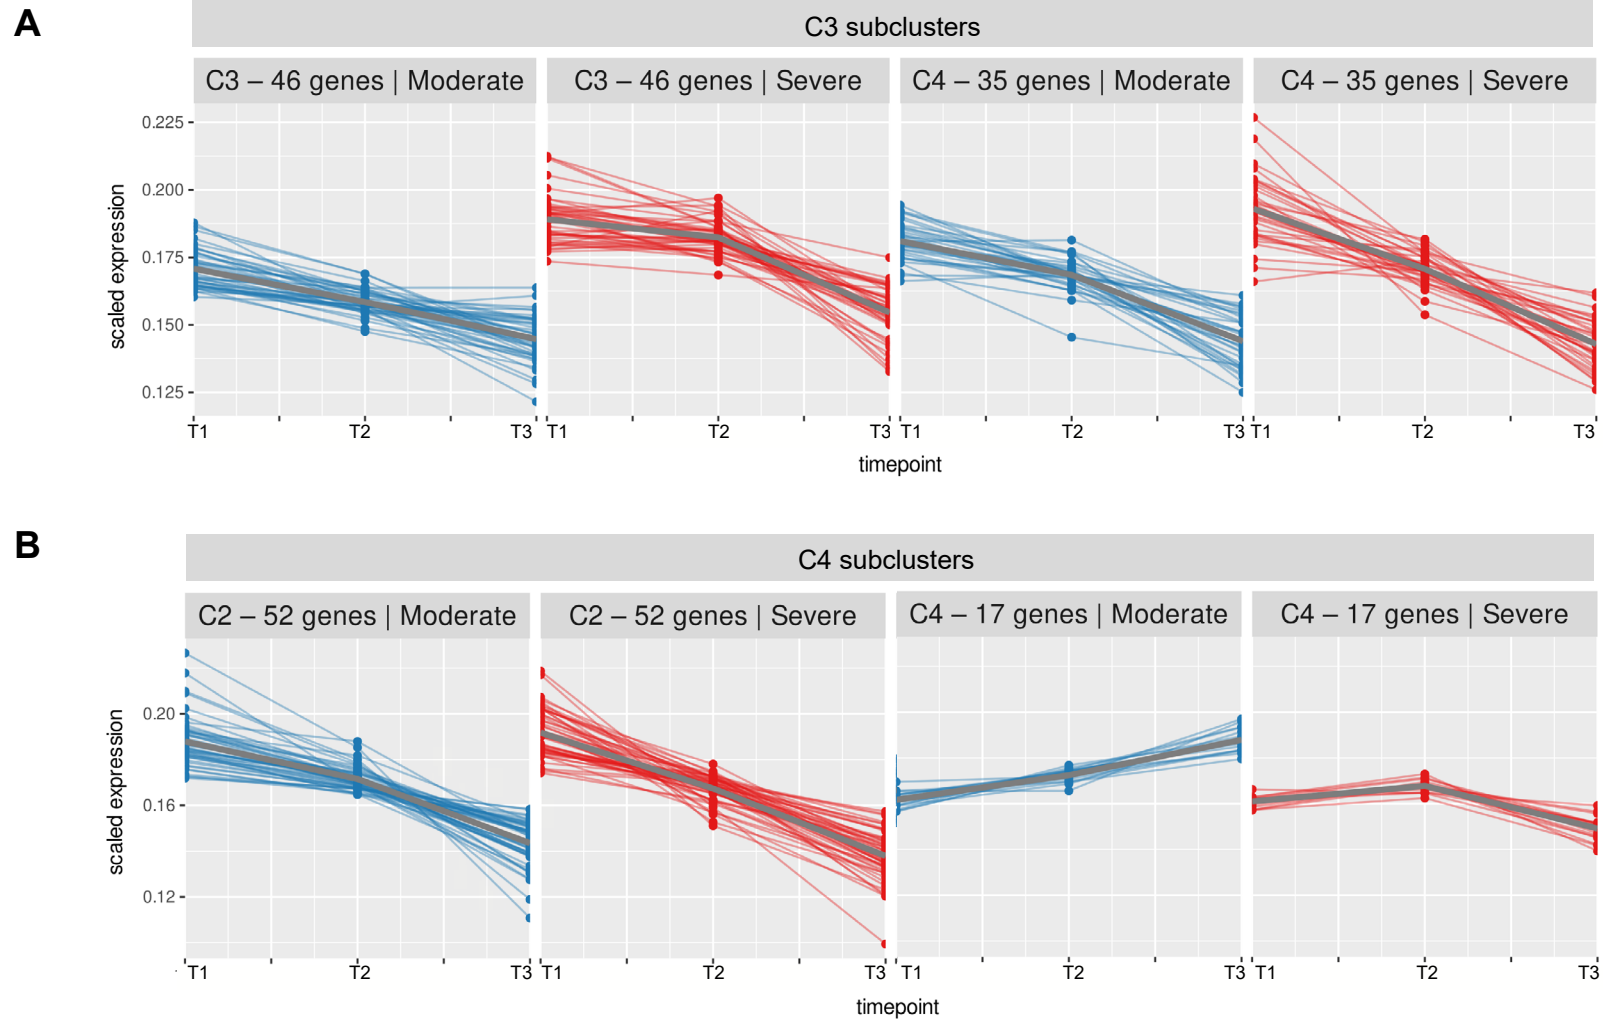

**Time series subclusters.** Trajectories of subclusters in A: C3 and B: C4. Patients with severe disease in red, moderate disease in blue. Mean scaled expression in grey.

## Supplementary Figure 5:

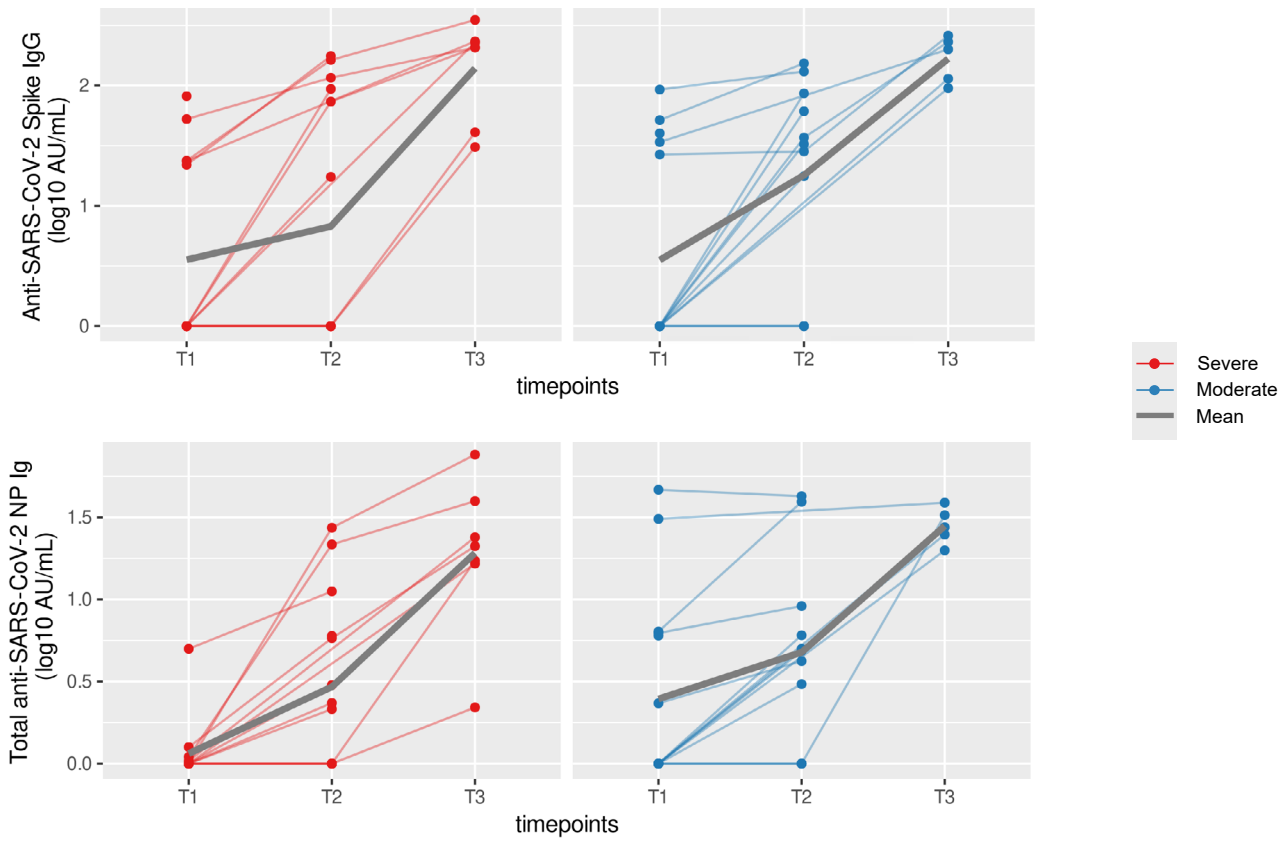

**SARS-CoV-2-specific antibody levels.** Levels of SARS-CoV-2-specific antibodies in serum samples, per patient, timepoint and severity group. Mean value per group in grey.

## Supplementary Figure 6:

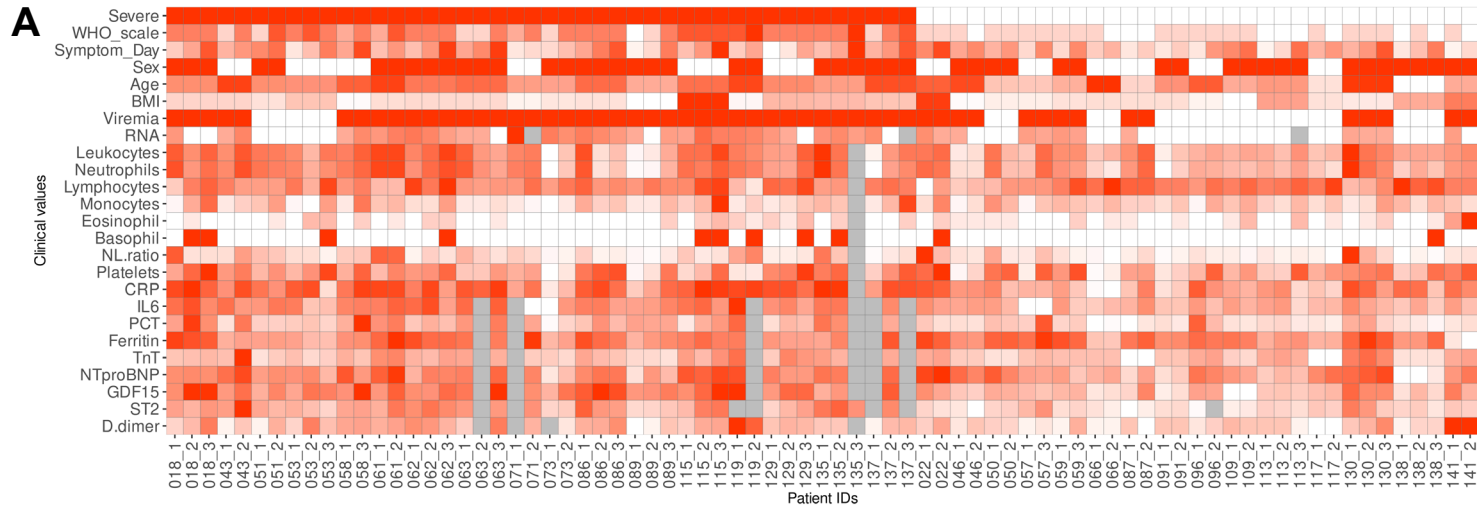

**Clinical trait heatmap.** Heat map of clinical traits and biomarkers for each sample. Biomarker variables are log-transformed. Grey boxes indicate missing data.

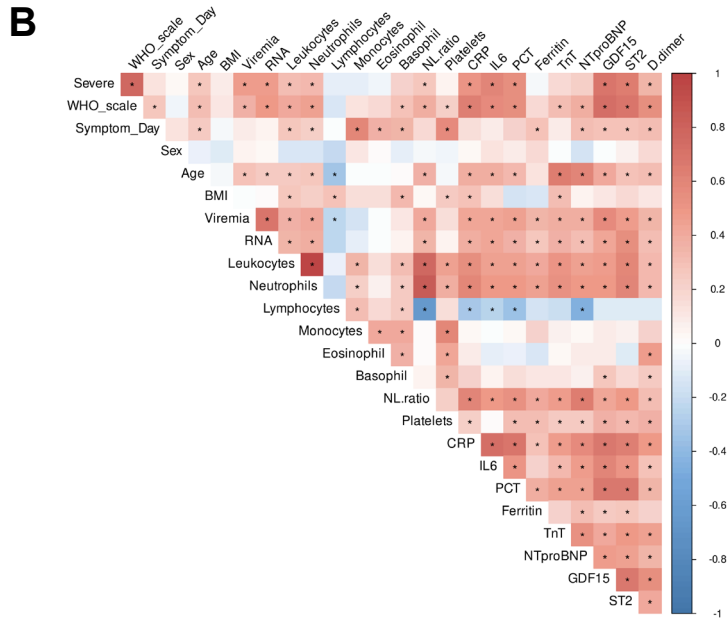

**Correlation between clinical traits and biomarkers.** Color indicates the correlation statistic, scale on the right. Dots indicate a p-value < 0.05.

## Supplementary Figure 7:

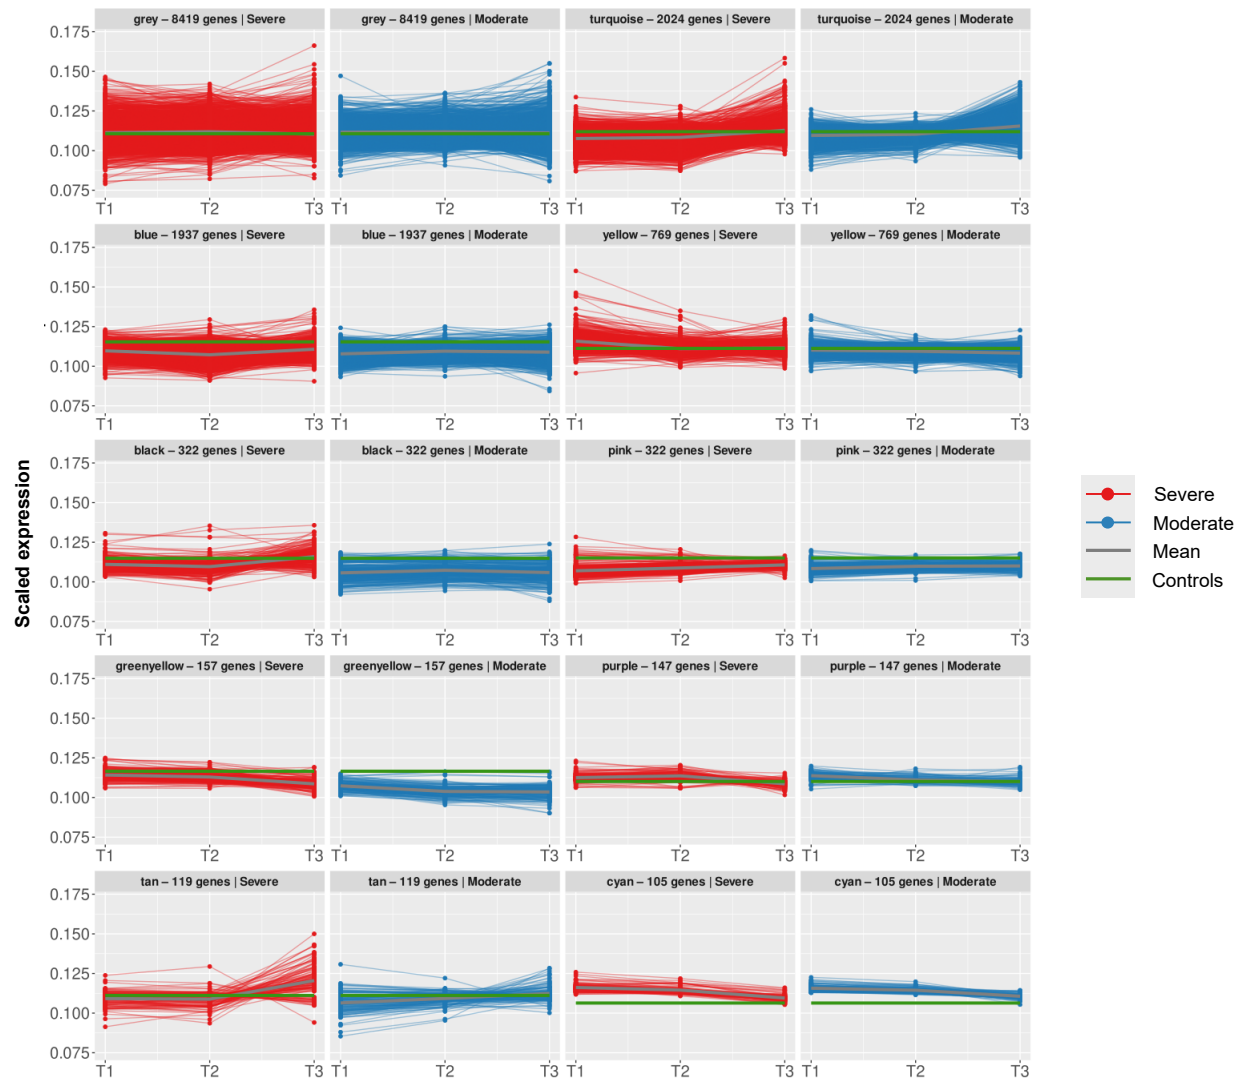

**Remaining WGCNA module trajectories.** Gene trajectories over time in severe (red) and moderate (blue) patients. Mean scaled expression in patients and healthy controls in grey and green, respectively.



**Supplementary figure 8:**

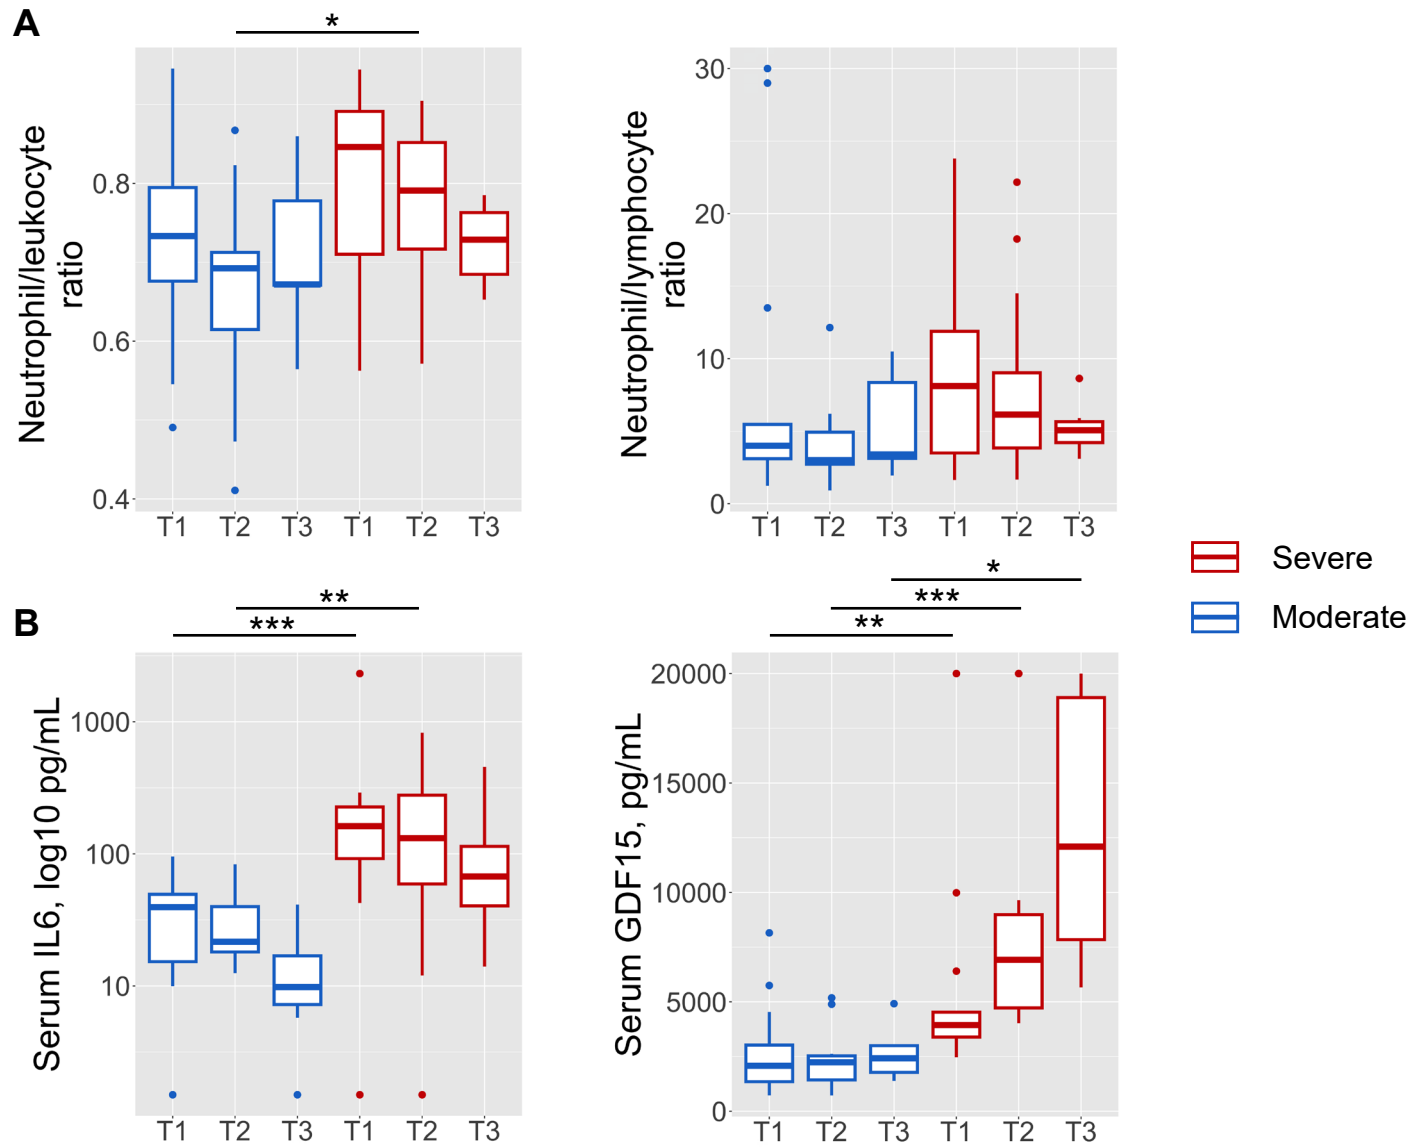

**Biomarkers:** A: Leukocyte ratios by clinical cytometry and B: serum concentrations of cytokines, per severity group and timepoint. Moderate in blue, severe in red. \*:  $p < 0.05$  \*\*:  $p < 0.01$  \*\*\*:  $p < 0.001$
